# Supplementary material
Source: MDPI journal article supplement (https://www.mdpi.com/2073-8994/14/8/1665)
Supplement: s1 [file s1]

## Supplementary information

### The Au<sub>12</sub> gold cluster: Preference for a non-planar structure

Pham Vu Nhat,<sup>1,\*</sup> Nguyen Thanh Si,<sup>1</sup> Nguyen Ngoc Khanh Anh,<sup>1</sup> Long Van Duong<sup>2,3</sup> and Minh Tho Nguyen<sup>4,5,\*</sup>

<sup>1</sup>Department of Chemistry, Can Tho University, Can Tho, Vietnam

<sup>2</sup> Laboratory for Computational Molecular and Materials Sciences, Science and Technology Advanced Institute, Van Lang University, Ho Chi Minh City, Vietnam

<sup>3</sup> Faculty of Applied Technology, School of Engineering and Technology, Van Lang University, Ho Chi Minh City, Vietnam

<sup>4</sup> Department of Chemistry, KU Leuven, Celestijnenlaan 200F, B-3001 Leuven, Belgium

<sup>5</sup> Institute for Computational Science and Technology (ICST), Quang Trung Software City, Ho Chi Minh City, Vietnam

**Table S1.** Optimized geometries, Cartesian coordinates (angstrom) and total energies (hartree) of some lower-lying isomers of the neutral Au<sub>12</sub> cluster (revTPSS/aVDZ-PP).

| Geometries                                                                                                    | Cartesian coordinates |              |              |              | Total energy |
|---------------------------------------------------------------------------------------------------------------|-----------------------|--------------|--------------|--------------|--------------|
| 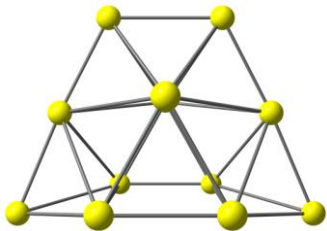<br>Iso_1, C <sub>2v</sub> | 79                    | 0.000000000  | 3.596599259  | -1.847649133 | -1627.455003 |
|                                                                                                               | 79                    | 0.000000000  | -3.596599259 | -1.847649133 |              |
|                                                                                                               | 79                    | -1.438081104 | 1.324130095  | -1.370853099 |              |
|                                                                                                               | 79                    | 1.438081104  | 1.324130095  | -1.370853099 |              |
|                                                                                                               | 79                    | -1.438081104 | -1.324130095 | -1.370853099 |              |
|                                                                                                               | 79                    | 1.438081104  | -1.324130095 | -1.370853099 |              |
|                                                                                                               | 79                    | 0.000000000  | 2.641209190  | 0.641278046  |              |
|                                                                                                               | 79                    | 0.000000000  | -2.641209190 | 0.641278046  |              |
|                                                                                                               | 79                    | -1.386842100 | 0.000000000  | 0.989876071  |              |
|                                                                                                               | 79                    | 1.386842100  | 0.000000000  | 0.989876071  |              |
|                                                                                                               | 79                    | 0.000000000  | -1.442335104 | 2.958201213  |              |
|                                                                                                               | 79                    | 0.000000000  | 1.442335104  | 2.958201213  |              |

|                                                                                                                            |                                                                                                                                                                                                                                                                                                                                                                                                                                                                                                                                      |              |
|----------------------------------------------------------------------------------------------------------------------------|--------------------------------------------------------------------------------------------------------------------------------------------------------------------------------------------------------------------------------------------------------------------------------------------------------------------------------------------------------------------------------------------------------------------------------------------------------------------------------------------------------------------------------------|--------------|
| 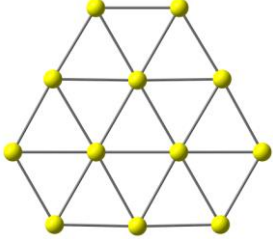 <p><b>Iso_2, <math>D_{3h}</math></b></p> | 79 1.335769096 3.874985279 0.000000000<br>79 -1.335769096 3.874985279 0.000000000<br>79 -2.687951193 -3.094302223 0.000000000<br>79 2.687951193 -3.094302223 0.000000000<br>79 2.714803195 1.567393113 0.000000000<br>79 -2.714803195 1.567393113 0.000000000<br>79 0.000000000 -3.134785225 0.000000000<br>79 4.023720290 -0.780683056 0.000000000<br>79 -4.023720290 -0.780683056 0.000000000<br>79 0.000000000 1.545348111 0.000000000<br>79 1.338311096 -0.772674056 0.000000000<br>79 -1.338311096 -0.772674056 0.000000000     | -1627.449633 |
|  <p><b>Iso_3, <math>C_s</math></b></p>    | 79 3.007025217 1.077969078 0.000000000<br>79 4.560194328 -1.019316073 0.000000000<br>79 1.391967100 3.173327229 0.000000000<br>79 1.958503141 -1.505456109 0.000000000<br>79 -0.379571027 -1.636313118 1.350371097<br>79 -0.379571027 -1.636313118 -1.350371097<br>79 -2.207548159 -1.389370100 -3.234366233<br>79 -2.207548159 -1.389370100 3.234366233<br>79 -1.628906117 2.670855192 0.000000000<br>79 -2.207548159 0.451048032 -1.378129099<br>79 -2.207548159 0.451048032 1.378129099<br>79 0.300551021 0.751891054 0.000000000 | -1627.436057 |
|  <p><b>Iso_4, <math>C_s</math></b></p>  | 79 -1.195520086 0.903864065 0.000000000<br>79 -0.732653053 2.182861157 2.368898170<br>79 -0.732653053 2.182861157 -2.368898170<br>79 0.162551012 3.284485236 0.000000000<br>79 -1.574478113 -1.778658128 0.000000000<br>79 -0.429997031 -0.649391047 2.242485161<br>79 -0.429997031 -0.649391047 -2.242485161<br>79 0.213684015 -3.236480233 1.456719105<br>79 0.213684015 -3.236480233 -1.456719105<br>79 1.559829112 1.116703080 1.352838097<br>79 1.559829112 1.116703080 -1.352838097<br>79 1.385723100 -1.237077089 0.000000000 | -1627.448441 |

**Table S2.** Relative energies (eV) of lower-lying Au<sub>12</sub> isomers computed at different levels.

| Method         | Iso_1 | Iso_2 |
|----------------|-------|-------|
| <b>revTPSS</b> |       |       |
| aVDZ-PP        | 0.0   | 0.17  |
| cc-pwCVDZ-PP   | 0.0   | 0.14  |
| cc-pwCVTZ-PP   | 0.0   | 0.04  |
| <b>CCSD(T)</b> |       |       |
| VDZ-PP         | 0.0   | 0.52  |
| VTZ-PP         | 0.0   | 0.04  |
| VQZ-PP         | 0.0   | 0.1   |
| cc-pwCVTZ-PP   | 0.0   | 0.1   |

**Table S3.** Relative energy (eV) of Au<sub>12</sub> lowest-lying isomers obtained using DFT-D3 calculations with the aug-pVDZ-PP basis set.

| Isomer       | PBE-D3 | TPSS-D3 | revTPSS-D3 |
|--------------|--------|---------|------------|
| <b>Iso_1</b> | 0.00   | 0.00    | 0.00       |
| <b>Iso_2</b> | 0.15   | 0.67    | 1.01       |
| <b>Iso_3</b> | 0.35   | 0.72    | 1.05       |
| <b>Iso_4</b> | 0.36   | 0.26    | 0.22       |

**Table S4.** Free energies ( $\Delta G$ ) of Au<sub>12</sub> isomers at different temperatures T = 100, 200 and 300 K

|              | $\Delta G$ , eV |         |
|--------------|-----------------|---------|
|              | revTPSSS        | CCSD(T) |
| T = 100 K    |                 |         |
| <b>Iso_1</b> | 0.00            | 0.00    |
| <b>Iso_2</b> | 0.20            | 0.06    |
| <b>Iso_3</b> | 0.57            | 0.31    |
| <b>Iso_4</b> | 0.16            | 0.28    |
| T = 200 K    |                 |         |
| <b>Iso_1</b> | 0.00            | 0.00    |
| <b>Iso_2</b> | 0.18            | 0.06    |
| <b>Iso_3</b> | 0.55            | 0.28    |
| <b>Iso_4</b> | 0.17            | 0.31    |
| T =300 K     |                 |         |
| <b>Iso_1</b> | 0.00            | 0.00    |
| <b>Iso_2</b> | 0.20            | 0.08    |
| <b>Iso_3</b> | 0.60            | 0.33    |
| <b>Iso_4</b> | 0.14            | 0.29    |

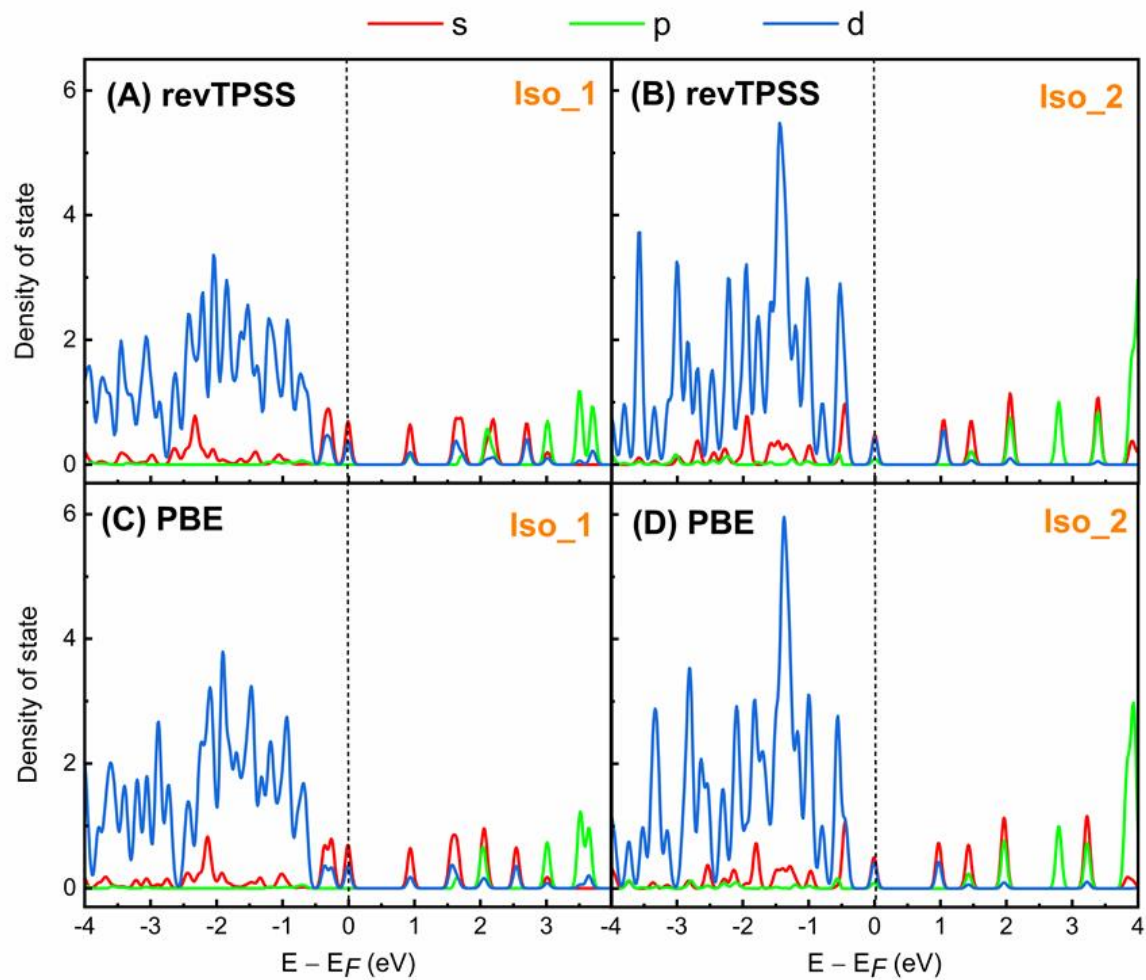

**Figure S1.** Partial density of states for two lowest-lying isomers of Au<sub>12</sub>.

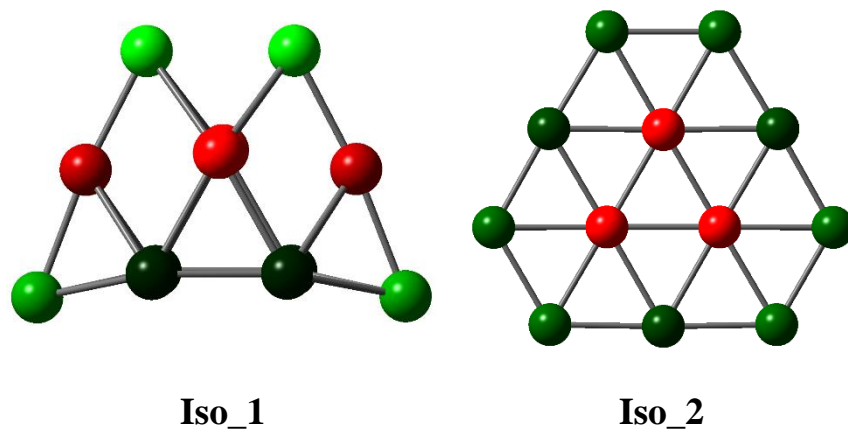

**Figure S2.** NBO charge distribution in two lowest-lying isomers **Iso\_1** and **Iso\_2**. Color range, in a.u.: green, more positive than 0.1; red, more negative than  $-0.1$ ; blue, between  $0.02 - 0.08$ .

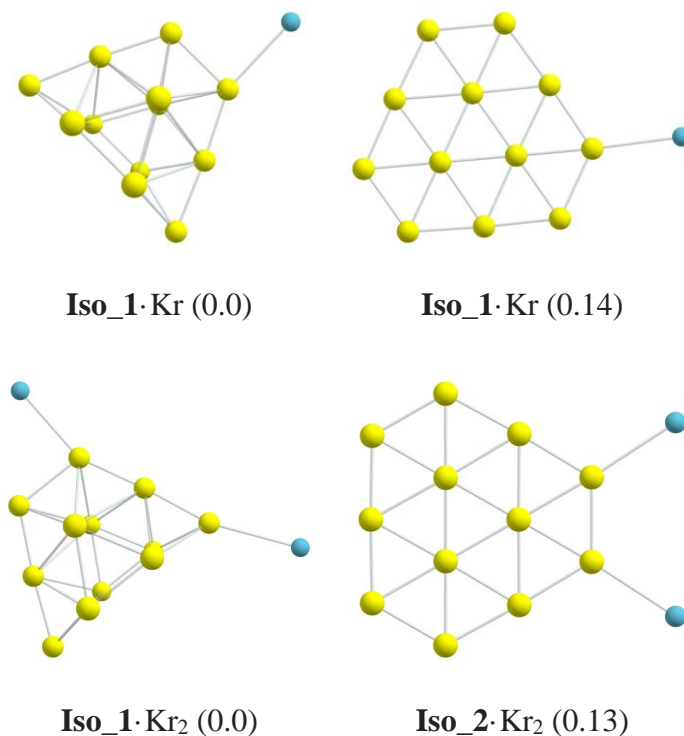

**Figure S3.** Optimized geometries and relative energy (eV) of **Iso\_1**·Kr<sub>x</sub> and **Iso\_2**·Kr<sub>x</sub> ( $x = 1, 2$ ) complexes (revTPSS/aVDZ-PP/cc-VTZ).

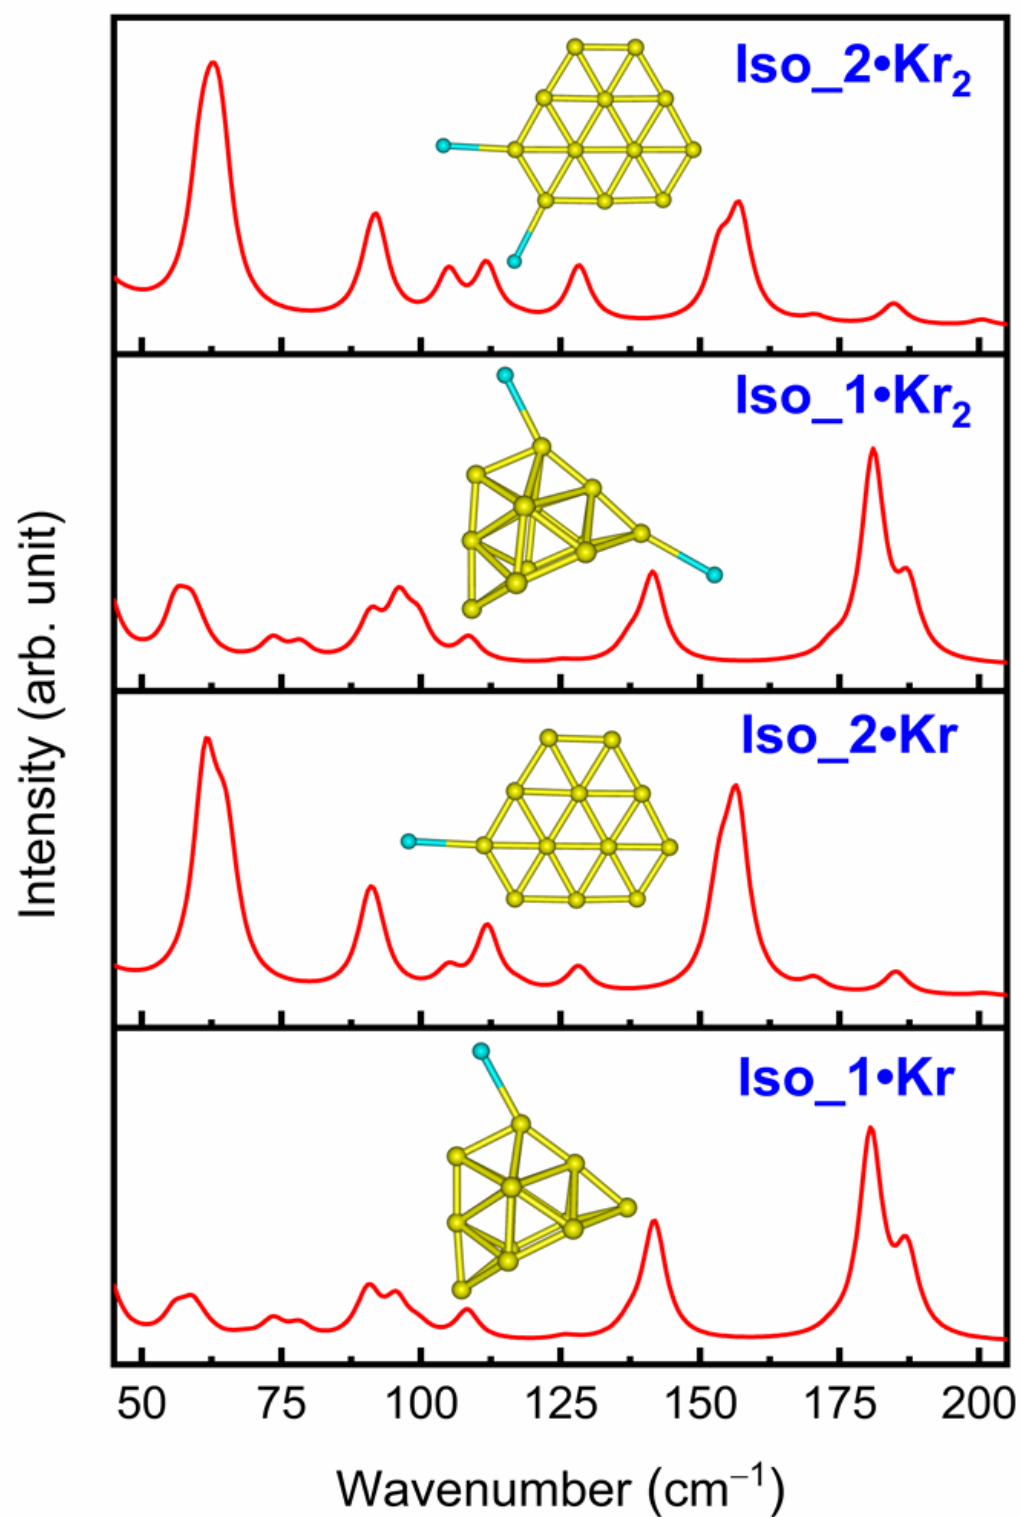

**Figure S4.** Calculated IR spectra of Iso\_1 and Iso\_2 complexes with one and two Kr atoms  
(revTPSS/aVDZ-PP/cc-VTZ).

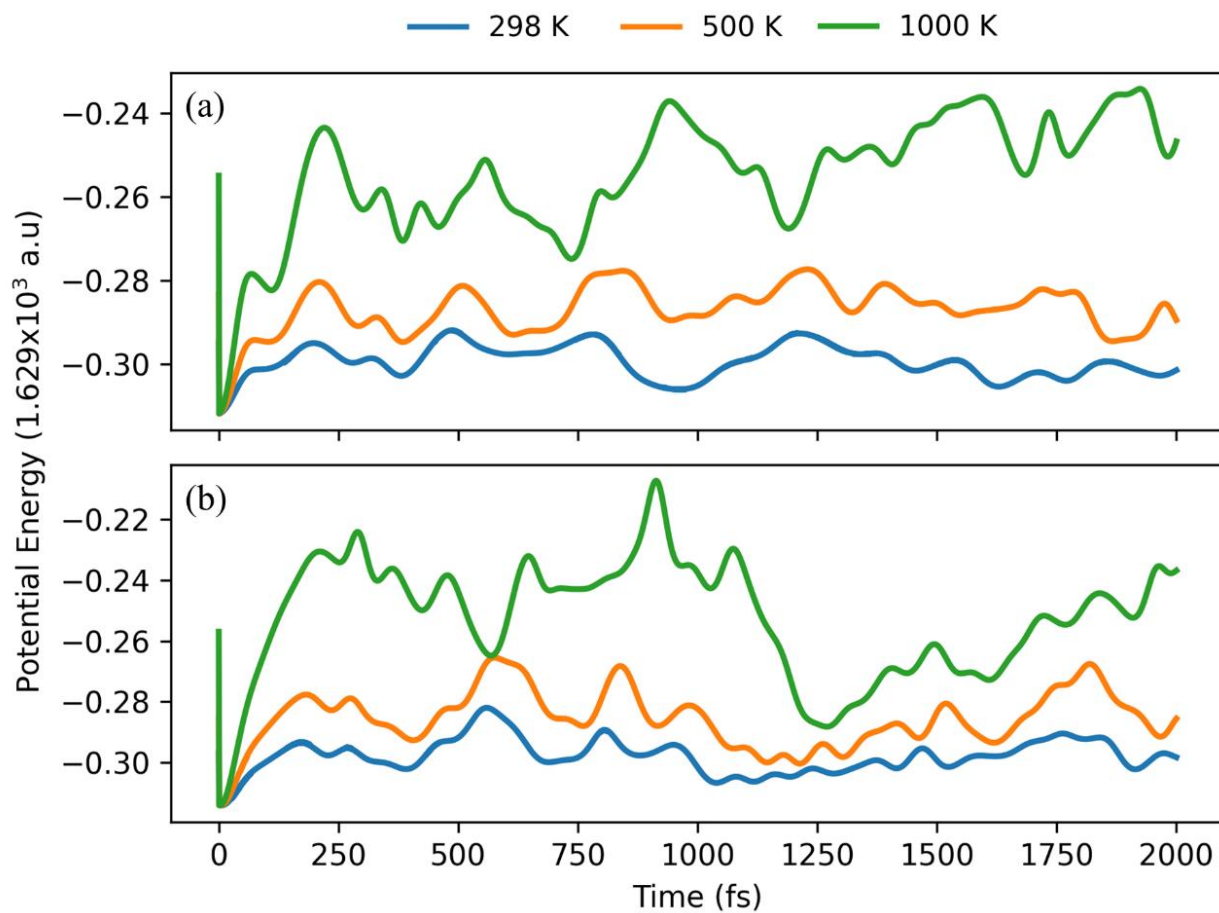

**Figure S5.** Potential energy trajectories at 100K, 200K and 298 K of **a)** 3D and **b)** 2D isomers.
